1 **Title.** Testing the phylogenetic gambit: how much functional diversity can we reliably conserve  
2 if we prioritize phylogenetic diversity?  
3

4

5

### 6 **Author list**

7 Florent Mazel<sup>1,2,3</sup>, Matthew W. Pennell<sup>3,4</sup>, Marc Cadotte<sup>5,6,§</sup>, Sandra Diaz<sup>7,§</sup>, Giulio Valentino

8 Dalla Riva<sup>8,§</sup>, Richard Grenyer<sup>9,§</sup>, Fabien Leprieur<sup>10,§</sup>, Arne O. Mooers<sup>1,§</sup>, David Mouillot<sup>10,11,§</sup>,

9 Caroline M. Tucker<sup>12,§</sup>, and William D. Pearse<sup>13</sup>

10

### 11 **Author affiliations**

12 <sup>1</sup> Department of Biological Sciences, Simon Fraser University, Burnaby, BC, Canada

13 <sup>2</sup> Department of Botany, University of British Columbia, Vancouver, BC V6T 1Z4, Canada;

14 <sup>3</sup> Biodiversity Research Centre, University of British Columbia, Vancouver, BC V6T 1Z4, Canada;

15 <sup>4</sup> Department of Zoology, University of British Columbia, Vancouver, BC V6T 1Z4, Canada;

16 <sup>5</sup> Biological Sciences, University of Toronto-Scarborough, Scarborough M1C 1A4, Canada

17 <sup>6</sup> Ecology and Evolutionary Biology, University of Toronto, Toronto, ON, Canada

18 <sup>7</sup> Instituto Multidisciplinario de Biología Vegetal. FECFyN - Universidad Nacional de Córdoba.

19 Casilla de Correo 495, 5000 Córdoba. Argentina

20 <sup>8</sup> Department of Statistics, University of British Columbia, Vancouver, BC V6T 1Z4, Canada;

21 <sup>9</sup> School of Geography and the Environment, University of Oxford, Oxford OX1 3QY, U.K.

22 <sup>10</sup> Marine Biodiversity, Exploitation, and Conservation (MARBEC), UMR 9190, Université

23 Montpellier, Montpellier, France

24 <sup>11</sup> Australian Research Council Centre of Excellence for Coral Reef Studies, James Cook

25 University, Townsville, QLD, Australia

26 <sup>12</sup> Department of Biology, University of North Carolina-Chapel Hill

27 <sup>13</sup> Ecology Center and Department of Biology, Utah State University, Logan, Utah

28 § Authors listed alphabetically

29 **E-mail addresses of the authors:** flo.mazel@gmail.com, mwpenell@gmail.com,  
30 mcadotte@utsc.utoronto.ca, sandra.diaz@unc.edu.ar, giulio.dallariva@googlemail.com,  
31 grenyer@gmail.com, fabien.leprieur@umontpellier.fr, amooers@sfu.ca,  
32 david.mouillot@umontpellier.fr, carolinemtucker@gmail.com, will.pearse@usu.edu

33

34 **Running title:** Testing the phylogenetic gambit

35

36 **Keywords:** conservation, EDGE, evolutionary distinct, trait diversity, evolutionary diversity

37

38 **Statement of authorship:** FM, MP, MC, SD, GVDR, RG, AOM, CT and WP conceived the design  
39 of the study. FM and GVDR conducted the analysis. FM, RG, MP and WP interpreted the results  
40 and wrote the first draft of the manuscript. All authors edited the final version.

41

42 **Data accessibility statement:** Most of the data is publicly available (see methods). The Fish data  
43 is available upon request.

44

45 **Code accessibility statement:** R functions developed in this paper are available at  
46 [https://github.com/FloMazel/FD\\_PD\\_Max](https://github.com/FloMazel/FD_PD_Max)

47

48

49 **Corresponding Author.** Florent Mazel. Department of Botany and Biodiversity Research Centre.  
50 The University of British Columbia | Vancouver Campus. 2212 Main Mall | Vancouver BC | V6T  
51 1Z1 Canada. flo.mazel@gmail.com. +17783024816

52 **Abstract**

53 In the face of the biodiversity crisis, it is argued that we should prioritize species in order to  
54 capture high functional diversity (FD). Because species traits often reflect shared evolutionary  
55 history, many researchers have advocated for a “phylogenetic gambit”: maximizing  
56 phylogenetic diversity (PD) should indirectly capture FD. For the first time, we empirically test  
57 this gambit using data from >15,000 vertebrate species and ecologically-relevant traits.  
58 Maximizing PD results in an average gain of 18% of FD relative to random choice. However, this  
59 average gain hides the fact that in over 1/3 of the comparisons, maximum PD sets contain less  
60 FD than randomly chosen sets of species. These results suggest that, while maximizing PD  
61 protection can help to protect FD, it represents a risky strategy.

## 62 Introduction

63 We are in the midst of a period of heightened biological extinction, with rates several orders of  
64 magnitude higher than background rates estimated from the fossil record<sup>1-3</sup>. In addition to  
65 having potentially widespread consequences for the functioning of ecosystems and the  
66 provisioning of valuable ecosystem services, this situation poses an immense moral challenge<sup>4-</sup>  
67 <sup>8</sup>. Since the extent that resources for conservation actions remain limited, agonizing choices as  
68 to which species most warrant attention become necessary<sup>9,10</sup>. To keep humanity's options  
69 open, and our common legacy as rich as possible, it is widely argued that we should seek to  
70 maximize the biological diversity of form and function in conservation strategies<sup>6-12</sup>. The  
71 biological diversity of form and function can be measured as functional diversity [FD] (see  
72 methods). However, in practice, it is challenging to prioritize species on the basis of FD: we have  
73 imperfect knowledge about which, and how many traits and functions are important in a given  
74 context, how these traits and functions vary among species and across space, and how the  
75 importance of traits may change in the future<sup>13</sup>. Many researchers have therefore advocated  
76 for a "phylogenetic gambit"; that is, if species traits reflect their shared evolutionary history,  
77 then the pattern of that evolutionary history—their phylogeny—should serve as a useful stand-  
78 in for unmeasured and unmeasurable traits<sup>9,14,15</sup>. The phylogenetic gambit implies that  
79 maximizing phylogenetic diversity (PD), i.e. the breadth of evolutionary history, will ensure that  
80 a wide variety of forms and functions are present within a species set<sup>14-17</sup>.

81  
82 Following this logic, phylogenetic diversity has formed the basis of global conservation  
83 schemes, notably the EDGE program<sup>18</sup> has been used by restoration biologists<sup>19</sup> and has been  
84 widely embraced by researchers across the biodiversity sciences<sup>20-23</sup>. Despite this enthusiasm,  
85 the critical question of whether maximizing PD will actually capture more FD than prioritization  
86 schemes that ignore phylogeny has, to our knowledge, never been empirically tested<sup>16</sup>. Some  
87 studies have discussed<sup>24,25</sup> and documented the relationship between FD and PD, both at  
88 regional<sup>26</sup> and global scales<sup>20,22</sup>, and many of these studies have shown that maximizing PD  
89 does not *maximize* FD. However, such studies do not test the fundamental phylogenetic gambit  
90 at the heart of all PD-based conservation strategies: maximizing PD captures *more FD than*

91 *randomly choosing species*. No one would dispute that the best way to maximize FD is to  
92 prioritize FD, but phylogenetic diversity has emerged as prioritization tool because we rarely  
93 have sufficient trait data to calculate FD. Here we test whether PD-based conservation passes a  
94 much less stringent, but ultimately more fundamental, test: is conserving on the basis of PD  
95 better than conserving at random? Worryingly, a recent theoretical study has indeed  
96 demonstrated that PD could be a poor surrogate for FD and, in some scenarios, prioritizing  
97 species on the basis of PD could actually lead to capture *less* FD than if species were simply  
98 selected at random<sup>16</sup>.

99 This points to the need for empirical tests of whether —within a given species pool— sets of  
100 species selected to maximize PD actually contain more FD than sets of species selected without  
101 regard to evolutionary relatedness. We clarify what our goals are in testing the utility of PD to  
102 capture FD. First, we take as given that maximizing PD is not the overarching goal *per se* of PD-  
103 maximization schemes, but rather that a PD maximization strategy is valued for its ability to  
104 capture more FD compared to a strategy that ignores phylogeny. Second, it is important to note  
105 that we are selecting *species* sets to maximize PD or FD within a region. While this is a  
106 simplification, as conservation actions often aim to select sets of *areas* (e.g. in reserve design),  
107 the only global phylogenetically-informed conservation initiative is species-centered<sup>18</sup> (EDGE).  
108 Critically, the question we raise has been shown to be distinct from asking whether traits have  
109 phylogenetic signal (whether closely related species tend to share similar sets of traits), since  
110 PD can be a poor surrogate for FD *even if* traits exhibit phylogenetic signal<sup>16</sup>.

111 We evaluate the PD~FD relationship for different species pools (taxonomic families and  
112 geographical assemblages, *i.e.*, sets of species co-occurring at a given scale) using a large global  
113 dataset including trait, phylogenetic, and geographic range data for 4,616 species of mammals,  
114 9,993 species of birds, and 1,536 species of tropical fish. Specifically, we measure FD as  
115 functional richness (see methods) and compute, for any given species pool, an estimate of  
116 surrogacy<sup>27,28</sup> ( $S_{PD\_FD}$ , Figure 1).  $S_{PD\_FD}$  represents the amount of FD sampled by the set of  
117 species chosen to maximize PD, relative to the FD sampled by optimal set of species selected to  
118 maximize FD directly, with both components controlled for the expected FD from a random

119 species set of the same size.  $S_{PD\_FD}$  will be positive if the averaged PD-maximized set contains  
120 more FD than the averaged random set, and negative if not.  $S_{PD\_FD}$  will equal 100% if the PD-  
121 maximization strategy is optimal (i.e. to maximize FD). We integrate  $S_{PD\_FD}$  for each species pool  
122 across all deciles of species richness but because they are many sets of species that can  
123 maximize PD or than can be chosen at random, we computed  $S_{PD\_FD}$  based on the averaged FD  
124 over 1000 PD-maximized sets and 1000 random sets <sup>16</sup>.

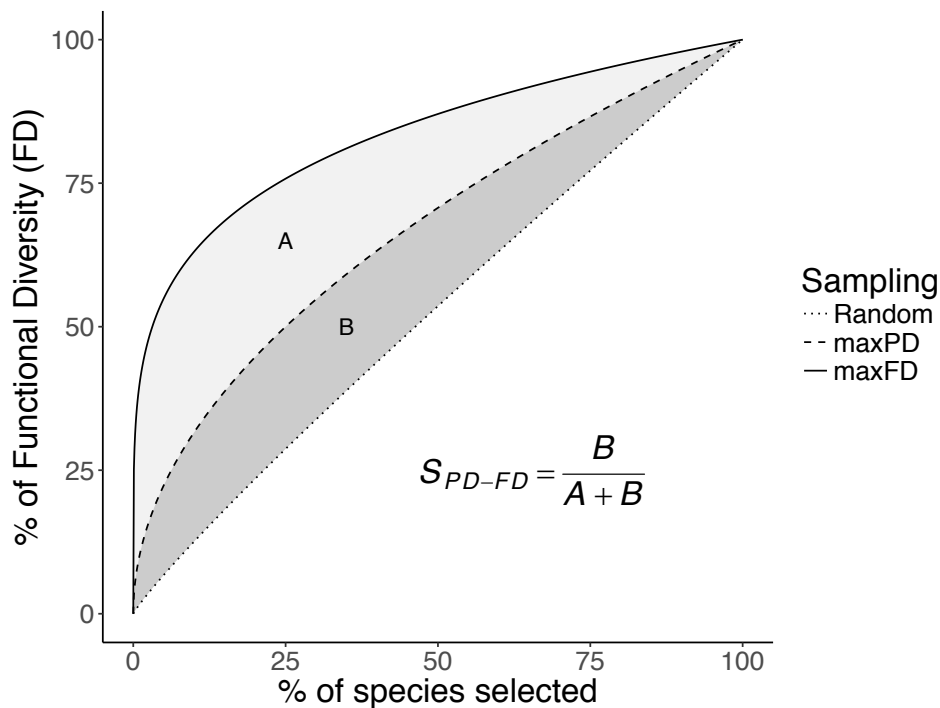

126 **Figure 1 – A conceptual approach for evaluating whether PD is a good surrogate for FD.** To  
127 evaluate if PD is a good surrogate of FD, we measure to what extent a species prioritization  
128 strategy that maximize PD captures FD relative to an optimal and a random strategy. To do so,  
129 we compare FD accumulation curves (i.e. FD computed for increasing proportion of the species  
130 pool considered) across these three different sampling strategies: the random sampling (i.e.  
131 rarefaction curve, averaged over 1000 sets), the maxPD (surrogacy, averaged over 1000 sets)  
132 sampling (i.e. the sets that maximize PD) and the maxFD (optimal) sampling (i.e. sets that  
133 maximize FD, see legends). Then, we measure the surrogacy of PD for FD ( $SD_{PD-FD}$ ) as the area  
134 between the random and the maxPD curve ('A', see legend) divided by the area between the  
135 random and the maxFD curve ('A+B', see legend). If  $SD_{PD-FD}$  is positive, PD is a good surrogate  
136 for FD (the maximum value being 1 where PD is an optimal surrogate) while when  $SD_{PD-FD}$  is  
137 negative preserving species based on PD is worse than preserving them at random.

138

139 **Results**

140 We find that selecting the most phylogenetically diverse sets of species within a given  
141 taxonomic family or within a given geographical location (large grid-cells across the globe)  
142 captures, on average, 18% more FD than sets of randomly chosen species (i.e.  $S_{PD\_FD} = 18\%$ , SD  
143  $\pm 6.5\%$  across pools, see Figure 1 and S1-2). Although the surrogacy is generally positive, there  
144 was substantial variation across species pools. For example, the surrogacy of PD varies widely  
145 from a minimum of -85% to a maximum of 92%, meaning that selecting the most  
146 phylogenetically diverse sets of taxa can capture either 85% less (or 92% more) FD than sets of  
147 randomly chosen taxa (Fig. 2-3 and Fig. S3-4). However, in 88% of the species pools, choosing  
148 sets of species according to PD captured more FD than would be expected at random (i.e.,  
149 surrogacy values  $> 0$  in 88% of the cases, see Fig. 2-3). This suggests that, on average,  
150 maximizing PD is a sound strategy to capture FD.

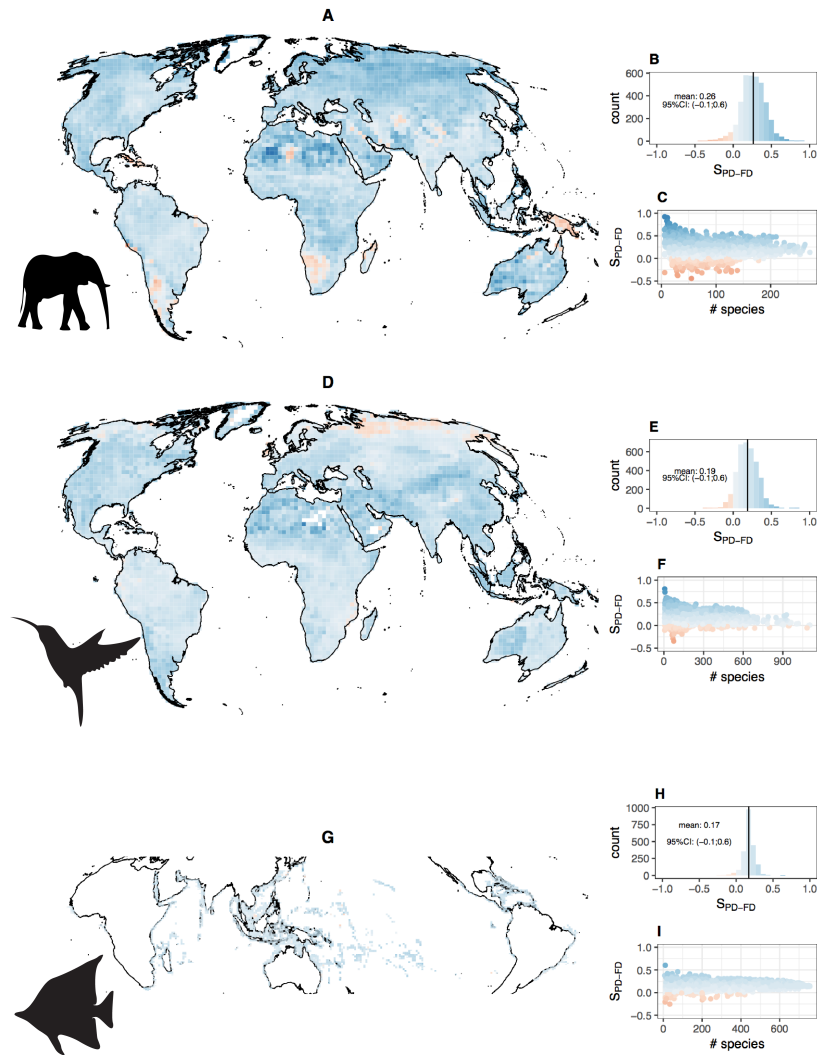

151

152 **Figure 2 – PD is a good surrogate for FD across space.** The figure presents the distribution and  
153 correlates of  $S_{PD-FD}$  for mammals (panels A-C), birds (panels D-F) and tropical fishes (G-I)  
154 separately across space. For each of the three groups, the  $SD_{PD-FD}$  frequency distribution is  
155 presented in top panels (B, E and H) along with its mean (vertical line) and the color code that is  
156 common to all panels, with blue indicating positive  $S_{PD-FD}$  (maximizing PD captures more FD  
157 than random).  $SD_{PD-FD}$  geographical distribution is presented in middle panels (A, D, G).  
158 Relationships between  $SD_{PD-FD}$  and species pool richness are presented in panels C, F and I. In  
159 each grid cell,  $SD_{PD-FD}$  values are based on the mean over 1000 repetitions of random and  
160 PDmax set draw (there is only one maxFD set).





171           However, even if in the majority cases maximizing PD does, on average, better than an  
172 averaged random selection, this does not capture the *reliability* of its performance. The PD-  
173 maximization and the random selection strategies exhibit variation: simply by chance, random  
174 selection of species can capture very high (or, conversely, very low) FD, and the same may be  
175 true (to a previously unstudied degree) for PD. The extent of this variation is important: if it is  
176 less than the average difference, PD-maximization is a reliable strategy as it will always yield  
177 more FD, but if it does not, then PD-maximization could be unreliable for individual  
178 conservation interventions. To contrast these two situations, we measured the fraction of times  
179 that, within each species pool, the PD-maximization strategy yielded more FD than random  
180 selection (see methods). PD-based selection was the best choice in 64% of cases (SD across  
181 species pool=9%, see Supplementary Table 1 and Fig. S5), making it the better strategy but not  
182 a perfectly reliable one. Thus, while the PD-maximization strategy has a consistent positive  
183 effect (i.e. the average PD-maximization strategy yields more FD than the average random  
184 strategy), its effect is weak (i.e. the PD-maximization strategy still yields less FD than the  
185 random strategy in 36% of the trials within a species pool).

186           We next explored the drivers of surrogacy values across species pools. Surrogacy of PD  
187 appears to weaken as the species pool richness increases (on average, Spearman Rho between  
188 absolute surrogacy and species richness = -.15), most clearly seen in the tropics and in  
189 species-rich families such as the Muridae (rats, mice and allies) and Columbidae (pigeons and  
190 allies) (Fig. 2-3). This is likely because our measure of FD (see Methods) rapidly saturates as the  
191 number of selected species increases and species from these large pools harbor high functional  
192 redundancy, such that a random prioritization scheme performs relatively well, or at least no  
193 worse than other strategies (Fig. S6). In contrast, FD can be greatly increased by prioritization of  
194 species using PD from species poor assemblages or clades. This is particularly the case in spatial  
195 assemblages containing multiple taxonomic orders, which are both phylogenetically and  
196 ecologically divergent from one another. Interestingly, the PD-FD relationship was not  
197 consistent across *taxonomic* scale: we found that, in contrast to patterns at the family level, for  
198 certain mammalian and avian orders (which are older than the families described above), using

199 PD to select species is much worse for capturing FD than choosing species at random (see, for  
200 example, the Afrosoricidae, Chiroptera, and Charadriiformes in Fig. S7).

201 We then explored whether we can explain this variability within- and between-datasets,  
202 and in particular, why for some assemblages/clades, a PD-prioritization strategy fails to capture  
203 more FD than random choice. It is often implicitly assumed that phylogenetic signal (i.e. the  
204 degree to which closely related species tend to harbor similar sets of traits) can be used to  
205 evaluate the effectiveness of PD as a surrogate for FD <sup>5,15-17</sup>. Surprisingly perhaps, the value of  
206 PD as a surrogate for FD was only weakly correlated with the phylogenetic signal of the  
207 underlying traits (Fig. S8-9, on average Spearman Rho = 0.17). Similarly, tree imbalance, which  
208 is known to affect surrogacy in simulations <sup>16</sup>, did not explain surrogacy in these empirical data  
209 (Fig. S8-9).

210 For mammals, regions where PD did worse than random were located in the Sahara,  
211 south western Patagonia, southern Africa including parts of Madagascar, and New Guinea  
212 (Figure 2). These latter two in particular are of concern since they are global conservation  
213 priorities on the basis of species endemism and habitat loss. We suggest two historical reasons  
214 for such idiosyncratic poor performance of PD. First, there is a tendency for a large carnivore  
215 species, either a top predator (*e.g.*, cheetahs in the Sahara or foxes in Patagonia) or a large  
216 scavenger (*e.g.*, the hyena in South Africa) to co-occur with a close relative with distinct traits in  
217 these areas (*e.g.*, a desert cat with the cheetah or the aardwolf with the hyena, see Fig. S10).  
218 Only one of these closely-related species will tend to be selected under prioritization schemes  
219 that maximize PD, thus reducing the volume of the convex hull on average when the  
220 functionally distinct one is not selected (the large predator or scavenger). This seems also to  
221 drive the low surrogacy of PD in Charadriiformes (especially *Larus* and *Sterna*; see Figure S10).  
222 Second, lineages in which traits evolve very slowly will contribute little to FD, even over long  
223 periods of time (branch lengths) that contribute greatly to PD. For example, in New Guinea  
224 many co-occurring bats with similar traits diverged long ago, such that they are always selected  
225 in the PD maximizing set, but do not add much to the convex hull, resulting in a poor surrogacy  
226 of PD for FD. Such strong ecological niche conservatism is common in mammals <sup>29</sup>, e.g. in the

227 Geomyidae: two basal branches of the Geomyidae tree harbor very similar traits (species  
228 descending from these branches are actually grouped in the same genus *Thomomys*) while  
229 being distantly related in the phylogenies we used (Fig. S10). As such, they will be selected in  
230 all PD maximizing sets, but will not contribute greatly to FD.

## 231 **Discussion**

232 Maximizing PD in conservation decisions is now commonplace in the academic world<sup>20–</sup>  
233 <sup>22,30–33</sup> and is also starting to be used in real-world conservation prioritizations, for example with  
234 the EDGE program<sup>18</sup>. To the best of our knowledge, there are no clear direct ecosystem  
235 function or health benefits that phylogenetic branch lengths provide. Rather, high PD is  
236 perceived as valuable because it is assumed to be a good proxy for high diversity of traits or  
237 “features”<sup>14</sup> (referred as to high functional diversity in this paper, FD), a hypothesis that we  
238 name the “phylogenetic gambit”. High FD might be valuable for a number of reasons, for  
239 example ecosystem functioning, ecosystem services, future “options values”<sup>14,15</sup> or  
240 “evolutionary potential”<sup>15,34</sup>. The utility of PD for conservation stems from the fact that  
241 calculating PD is relatively fast and cheap, often making it an easier way to prioritize species or  
242 areas than FD. Indeed, we have imperfect knowledge about which, and how many, traits and  
243 functions are important in a given context, how these traits and functions vary among species  
244 and across space, and how the importance of traits may change in the future<sup>13</sup>. Yet, even if  
245 convenient, maximizing PD can only be an effective and realistic conservation strategy to  
246 conserve FD if the phylogenetic gambit holds and maximizing PD yields more FD than a strategy  
247 that ignores phylogeny. If maximizing PD yields *less* FD than a random strategy (i.e., the gambit  
248 fails), then researchers and conservationists should reconsider whether maximizing PD as a  
249 useful conservation strategy. A large body of literature has shown that maximizing PD does not  
250 maximize FD empirically<sup>20–22,30</sup> or even in simple theoretical cases<sup>16</sup>, but such work does not  
251 test the phylogenetic gambit of whether PD prioritization captures more FD than *random*  
252 selection (which has not, to our knowledge, been tested)<sup>16</sup>. Here we have shown that the  
253 phylogenetic gambit holds: that PD *is* an effective conservation metric to capture FD. Yet we

254 also show that it remains something of a gambit: PD is good ‘on average’, but there is still some  
255 risk associated with taking it.

256 We found that prioritizing the most phylogenetically diverse set of taxa in a region or  
257 clade will result in an average gain of 18% functional diversity relative to applying the same  
258 conservation effort without considering phylogeny, but this gain will decrease as species  
259 richness increases. In opposition to what has previously been implicitly assumed<sup>15,16</sup>, we find  
260 weak empirical evidence that the presence of phylogenetic signal in traits predicts whether PD-  
261 based conservation will prioritize FD. Our result suggests that PD is a reasonable conservation  
262 prioritization strategy, especially in species-poor clades or regions, or in the absence of  
263 meaningful data on functional traits. However, we note three important caveats to the use of  
264 this strategy. First, 18% extra FD may not always be a useful conservation target. It is currently  
265 unknown whether this added 18% of FD can actually be of enough conservation value. Second,  
266 in cases of either recent trait divergence or, alternatively, very strong trait conservatism, a PD  
267 prioritization scheme can capture less FD than a random scheme. Evolutionary biologists  
268 commonly focus on ‘unusual’ clades with rapid divergences (e.g., cichlids); we show here that  
269 divergence does not have to be that spectacular (e.g., African carnivores) to alter the PD-FD  
270 relationship. Third, we found that while this strategy, on average, captures FD well, it is also  
271 somewhat unreliable, and 36% of the time will not capture more FD than random choice. This  
272 means that while the PD gambit can be a bet worth taking, it is still a bet with associated risk,  
273 not a sure thing.

274 Our objective in this paper is to test the phylogenetic gambit using empirical datasets.  
275 This means that we do not aim to provide a coherent prioritization strategy<sup>35</sup>, or ready-to use  
276 conservation guidelines. Indeed, we simplistically and implicitly assume that chosen species will  
277 either be saved or go extinct, and we have not linked our various scenarios to any particular  
278 policy position or conservation objective other than maximizing FD within a phylogenetic clade  
279 or region<sup>28,31</sup>. In reality, conservation decisions reflect the interplay of social, economic,  
280 political, and scientific priorities, and do not necessarily result in the saving of target species  
281 (and therefore of their associated FD or PD). While our study is thus not directly applicable, the

282 test we are conducting is actually critical to validate (or invalidate) the use of PD in conservation  
283 as a whole. While it is not clear whether our results would generalize to other taxa (although  
284 we hope that others will extend our work and test the phylogenetic gambit in other systems),  
285 we do feel it is important to consider the uncertainty that has been introduced into our analysis  
286 as a result of uncertainty associated with the spatial scale of our analysis, our phylogenetic  
287 data, and our choice of trait and measurement of FD.

288         The scale of conservation activities can vary, from the global scale of the hotspots  
289 approach to local protected areas within a single country, but, unfortunately, the connection  
290 between these scales remains unclear. For example, if the motivation for protecting FD is to  
291 maintain community-driven ecosystem functions and services<sup>6,36,37</sup>, the value of a regional or  
292 global focus may be questionable<sup>38</sup>, and studies are increasingly focusing on local scales<sup>6</sup>.  
293 Ecologists are refining and improving our understanding of how local assemblages assemble  
294 within a regional context<sup>39</sup>, and while the concept of the ‘regional pool’ of species is  
295 increasingly being viewed as a simplification, it is unlikely that regional- and local-scale patterns  
296 are totally disconnected. We emphasize that our results are relatively robust to variation in  
297 spatial scale (see Fig. S3), but we acknowledge that future studies should test the phylogenetic  
298 gambit at more local scale as well.

299         The set of species that maximize PD obviously rely on the phylogenetic hypothesis used.  
300 No hypothesis is perfect or without uncertainty, and these phylogenetic uncertainties could in  
301 turn impact the composition of the set of species that maximize PD and hence the surrogacy  
302 values we compute. In this study, we explicitly took into account these uncertainties by using  
303 100 different trees<sup>40,41</sup>. The explicit propagation of this phylogenetic uncertainty through into  
304 our results may underlie some of the uncertainty (‘risk’) of our result, and we suggest it is  
305 important that future studies explicitly take into account phylogenetic uncertainty when testing  
306 the phylogenetic gambit.

307         The motivator of our test of the surrogacy value of PD for FD is the fact that ecologically-  
308 relevant trait data is in short supply, especially for rare and data-deficient species. Indeed, if it  
309 were not for this relative paucity of data, we could simply prioritize species based on their

310 unique contribution to FD directly. Although there have been massive and well-funded efforts  
311 to collect and curate trait data from across the Tree of Life<sup>42-44</sup>, we are still far from having  
312 comprehensive coverage. Furthermore, despite recent progress<sup>45</sup>, it is still not fully understood  
313 which traits are most relevant for responses to environmental change, or that contribute most  
314 to certain ecosystem functions and services, and how these vary among systems. Our analysis  
315 suffers from a similar data limitation. We chose these traits because they are frequently  
316 collected in ecological studies, not because we know they are ecologically important. Our  
317 assumption is that their phylogenetic distribution is typical of those traits that are most  
318 desirable for the purpose of conservation and that our primary results are therefore widely  
319 applicable. While we did test the robustness of our results to the variation of trait information  
320 retained to compute FD (Figure S1), it is true that, overall, we used a rather limited set of traits.  
321 We acknowledge that it is possible that many other potential valuable traits are not captured  
322 by our measure of FD. One of the ideas behind the use of PD is that phylogeny might account  
323 for these for unmeasured and unmeasurable traits<sup>9,14,15</sup>, however, as this hypothesis is not  
324 testable (we do not have these traits), it seems risky to assume it is true. Our objective here is  
325 to test the phylogenetic gambit given the limited set of traits that we have: we consider that  
326 carrying out our imperfect test is more informative than not carrying any test at all.

327         In conclusion, we found that maximizing PD results in an average gain of 18% of FD  
328 relative to random choice. However, this average gain hides the fact that in over 1/3 of the  
329 comparisons, maximum PD sets contain less FD than randomly chosen sets of species. These  
330 results suggest that, while maximizing PD can help capture FD, it represents a risky strategy. If  
331 maximizing PD is a risky strategy, then, should we abandon the use of PD in conservation? We  
332 believe that before such dramatic decision, our test should be repeated across space, traits and  
333 taxa, in order to narrow the uncertainties of our results. This is why we now urge others to  
334 expand our simple phylogenetic gambit test to other clades and other traits in order to test the  
335 generality of our findings. We hope that our study will stimulate the production of numerous  
336 tests to finally rigorously assess the usefulness of PD in conservation.

337

338

339

340 **Acknowledgements**

341 This paper is a joint effort of the sCAP working group funded by the Synthesis Centre of the  
342 German Centre for Integrative Biodiversity Research Halle-Jena-Leipzig and the Canadian  
343 Institute for Ecology and Evolution. FM was supported by an NSERC Accelerator Grant to AOM  
344 and a Banting Post-doctoral fellowship. GDR thanks Mike Steel. We thank Risa Sergeant at the  
345 University of Ottawa for hospitality, the Crawford Lab for Evolutionary Studies at SFU for  
346 discussion.

347 **Competing interest.**

348 No competing interest.

349 **Material and Methods**

350 We use two classes of data to address the question of whether choosing sets of species  
351 according to PD captures the underlying trait diversity (as measured with FD) well. First, we  
352 used taxonomic groups (clades) of species as our unit of analysis ('species pool' hereafter) and,  
353 second, we investigated broad assemblages found across the globe. The former is more  
354 explicitly evolutionary, ensuring that our results are not driven by well-established relationships  
355 across large taxonomic groups (*e.g.*, monotremes are distinct from placental mammals) and the  
356 latter is likely more relevant to actual conservation practice.

357 **1. Data**

358 We use distribution data to delineate geographical assemblage species pool and taxonomy to  
359 delineate clade-based species pools (namely families and orders).

360 **Distribution data** – For mammals, we used the distribution maps provided by the Mammal  
361 Red List Assessment (<http://www.iucnredlist.org/>) for 4,616 species. For birds, full (breeding  
362 and wintering) and breeding ranges distribution maps were extracted from BirdLife  
363 (<http://www.birdlife.org/>) for 9,993 species. The best resolution at which these maps should



364 be used is still under discussion in the literature, so we decided to use the 40 000km<sup>2</sup>  
365 resolution (200x200km grid cell at the equator) that is commonly used at global scale <sup>46,47</sup>.  
366 The total number of grid cells was 3,646. Domestic and aquatic mammals were excluded  
367 from the analysis. In order to make sure our results were not driven by the important trait  
368 difference between volant and non volant mammals, we repeated our results excluding bats.  
369 For birds, we repeated our analysis using the full ranges. Finally, we evaluated the  
370 robustness of our result to the spatial resolution considered by repeating our analysis at a  
371 resolution of 100x100km (number of cells was 13,330) for birds and mammals; we present  
372 these results in the supplementary materials, as they are qualitatively identical to those  
373 conducted at 200x200km (Fig. S1). For fishes, we used a database of 1536 species, for which  
374 we had distribution data, phylogenetic and functional data. Distribution data were extracted  
375 from a global-scale distribution database <sup>48</sup>. Species composition was then extracted from  
376 grid cells of 5°x5°, corresponding to approximately 555x555 km at the equator <sup>49</sup>. This grain  
377 size of the grid was chosen because it represents a good compromise between the desired  
378 resolution and the geographical density of information.

379  
380 **Phylogenies** – In order to prioritize species to maximize PD, phylogenies of each species pool  
381 are needed. We used the first 100 published calibrated ultrametric trees of Jetz et al. (2012) for  
382 birds and Faurby and Svenning (2015) for mammals. By repeating our analyses across a  
383 posterior distribution of phylogenetic hypotheses, we control and account for phylogenetic  
384 uncertainty. For tropical reef fishes, we built a phylogeny for 18 families (i.e. Labridae, Scaridae,  
385 Pomacentridae, Chaetodontidae, Acanthuridae, Haemulidae, Balistidae, Carangidae,  
386 Serranidae, Lutjanidae, Sparidae, Caesionidae, Holocentridae, Mullidae, Muraenidae,  
387 Tetraodontidae, Lethrinidae and Siganidae) by pruning a dated molecular phylogenetic tree for  
388 7,822 extant fish species <sup>49</sup>. These families were selected as the most representative tropical  
389 reef fish families, that is, they are abundant and speciose on tropical reefs. We grafted missing  
390 species on the pruned phylogenetic tree (circa 50% among the 1536 studied species) based on  
391 published phylogenies for these families, supplemented by taxonomic information from fish  
392 identification guides and FishBase <sup>49,50</sup>. We recorded, for each of these trees, a measure of

393 imbalance (as measured by  $\beta$ <sup>51</sup>) and ‘tipiness’ (as measured by Gamma<sup>52</sup>). For both mammals  
394 and birds, we chose to group species in families and orders. We used these groupings when  
395 calculating the purely phylogenetic, clade-based analyses (to address question 1), but not  
396 within the spatial, assemblage-based analyses (question 2). For the taxonomic analysis of  
397 mammal families, we removed two families (Dipodidae and Echimyidae) because of their very  
398 poor phylogenetic resolution (i.e. polytomies for an important number of species).

399

400 **Traits** – For birds and mammals, four traits (diet, (log transformed) body mass, activity cycle,  
401 and foraging height) were extracted from Elton Traits1.0<sup>44</sup>. These traits are generally assumed  
402 to appropriately represent Eltonian niche dimensions within an assemblage or clade of  
403 mammals or birds<sup>53,54</sup>. For fishes, we used a previously published database<sup>12</sup>. We used 6  
404 categorical traits: size, mobility, period of activity, schooling, vertical position in the water  
405 column, and diet (for a full description of the dataset, see Mouillot *et al.* 2014). These traits  
406 have already been used to investigate community assembly rules<sup>55</sup> and to seek vulnerable fish  
407 functions<sup>11</sup>. For each clade and assemblage, we used the raw trait (only body mass was log-  
408 transformed and rescaled by the clade/assemblage range of body masses) values to compute  
409 distance between species using Gower distance [19] and use PCoA to summarize the trait space  
410 in few dimensions. We retained the numbers of PCoA axes necessary to represent 70% of the  
411 total initial variability (using a 80% threshold did not quantitatively change our conclusions, see  
412 Fig. S1). We also recorded phylogenetic signal for each PCoA axis using Blomberg’s K<sup>56</sup>.

413

## 414 **2. Approach**

415 Our aim was to evaluate, across a wide range of clades and regions, the ability of PD-informed  
416 prioritization scheme to capture FD in comparison with two other prioritization schemes:  
417 selecting species to directly maximize FD (‘maxFD’ hereafter) and selecting species randomly  
418 (Figure 1). Our premise was that we often do not know or have not measured the traits that are  
419 most relevant for ecosystem function and services such that maximizing FD is not generally  
420 feasible. By focusing on a subset of traits and assuming that they are representative of

421 ecologically relevant traits, we were able to get an estimate of how well PD does compared to  
422 the best we could possibly do. We used performance relative to choosing on the basis of FD as  
423 an upper-limit to the performance of PD as a surrogate for FD, and used random species  
424 selection as a lower benchmark.

425 **Random prioritization scheme** – For each pool (i.e. each clade and each geographical  
426 assemblage) and each number of selected species (10, 20, 30, 40, 50, 60, 70, 80, 90, and 100%  
427 of the total pool), 1000 random sets of species were produced, from which the average FD was  
428 recorded.

429 **Prioritization scheme maximizing PD (maxPD)** – While there are many, overlapping metrics for  
430 measuring the evolutionary history encompassed by a set of species<sup>15,57</sup>, the most common is  
431 the sum of all branch lengths (often in units of time) connecting a set of species to a common  
432 root<sup>14</sup>, called Phylogenetic Diversity (PD). This is the metric whose maximization has most  
433 commonly been proposed as a conservation prioritization metric<sup>14,34,58</sup>, and as a measure of  
434 phylogenetic ‘richness’ it most naturally maps onto our chosen FD metric<sup>57</sup>. We used the  
435 greedy algorithm proposed by Bordewich *et al.* (2008) to find our maxPD set of species *S*. For a  
436 given tree there are likely multiple, and possibly very many, sets of species with the same PD as  
437 *S*. As a consequence, we produced, for each pool, each number of selected species, and each  
438 alternative phylogenetic trees, 10 maxPD sets of species. We then averaged the FD of these  
439 sets across our 100 phylogenetic trees, so that each value is an average of 1000 sets (10 sets for  
440 each of the 100 trees).

441  
442 **Prioritization scheme maximizing FD (maxFD)** – Functional diversity was estimated using a  
443 functional richness index (FRic; Cornwell *et al.* 2006; Villéger *et al.* 2008; Pavoine & Bonsall  
444 2011). The FRic index relies on a multidimensional Euclidean space, where the axes are traits  
445 (or factorial axes from a principal coordinates analysis (PCoA) computed using these traits)  
446 along which species are placed according to their trait values. This index measures the volume  
447 of trait space occupied by a given species assemblage by calculating the convex hull volume<sup>62</sup>,  
448 defined by the species at the vertices of the functional space, that encompasses the entire trait

449 space filled by all species in this assemblage. In a single dimension, this simply equals the range  
450 of values<sup>62</sup>. This broadly used metric in ecology is set monotonic with species richness, a  
451 property generally assumed desirable in conservation whereby the addition of a new species  
452 can never decrease the metric's value<sup>63</sup>. FD measures the total amount of variation in trait  
453 values, making it conceptually comparable to PD<sup>57</sup>. We used the FRic index instead of the FD  
454 index based on a functional dendrogram (Petchey & Gaston, 2006) since recent studies showed  
455 that the FD index may lead to biased assessments of functional diversity and inaccurate  
456 ecological conclusions<sup>64</sup>. The most straightforward way to obtain the maximal FD for  $n$  species  
457 is to compute FD for all possible combinations of  $n$  species and simply record the greatest value  
458 (the brute force approach). However, this is not feasible in practice as the numbers of  
459 combinations of selected species was too high (e.g.,  $10^{71}$  possible sets for all mammal  
460 assemblages). To rapidly and efficiently find the set of species that aim to maximize FD, we  
461 developed a novel (at least in ecology) greedy algorithm. In brief, our approach iteratively  
462 (starting with two species) select the species that is the furthest from the centroid of the  
463 already selected set. To avoid selecting two species that are far from the centroid but close to  
464 each other, we penalized the distance to the centroid by the distance to the closest neighbour  
465 in the already selected set. Here we present in details the greedy algorithm we used to find the  
466 set of species that maximize FD:

467 Step 1. Select the two species with the highest trait distance

468 Step 2. Compute the centroid of these two selected species

469 Step 3. Compute distances between species not in the set and this 'set centroid'.

470 Step 4. Penalize these distances by adding the following factor  $f$  (Eq. 1)

$$471 \quad f = K \times e^{L \times \min D} \quad (\text{eq. 1})$$

472 with  $K$  and  $L$  being penalizing factors and  $\min D$  the distance between a given candidate  
473 species and the nearest species already in the selected set.

474 Step 5. Select the species that maximized the penalized distance

475 Step 6. Go back to step one with this new set of species until the desired number of  
476 species is reached.

477

478 To avoid arbitrarily setting the penalizing parameters, we tested 1000 pairs of parameters  
479 drawn from a truncated normal distribution (mean=1, sd=.5) and retained the parameter pairs  
480 that yielded the maximal FD.

481 In tests of subsets of the data for which finding the true maxFD was feasible, we found our  
482 approach to adequately approximate the true maxFD and to produce a very good  
483 approximation of the true degree of PD's surrogacy for FD (Fig. S2).

484

#### 485 **Measuring performance and surrogacy of prioritization schemes.**

486 We use a common approach<sup>27,28</sup> to quantify the extent to which a given surrogate (here, the  
487 maxPD choice) reaches a certain objective (here, maximize FD). Species from a given pool (i.e.,  
488 for each dataset (clade and assemblages) independently,) were prioritized and selected  
489 according to (1) the objective, i.e. maximize FD, producing the 'optimal curve' (maxFD curve in  
490 Figure 1), (2) the surrogate i.e. maximize PD, producing the 'surrogate curve' (maxPD curve in  
491 Figure 1) and (3) at random (random curve in Figure 1), i.e. producing the 'random curve'  
492 (Figure 1). To compute a 'surrogacy' estimate of PD ( $S_{PD-FD}$ ), we compare the position of the  
493 surrogate curve (1) to the random curve (2) relative to the optimal curve (2) (Figure 1 and Eq. 2)  
494 across the deciles of species richness of the pool (given as an interval 0-1):

$$495 \quad S_{PD-FD} = \int_0^1 \frac{FD_{maxPD} - FD_{random}}{FD_{maxPF} - FD_{random}} \quad (\text{Equation 2})$$

496

497 This surrogacy metric is at 100% when the surrogate perfectly meets the objective (i.e., the  
498 maxFD and maxPD curves are identical and the max PD set is the maxFD set), 0% when the  
499 surrogate is not better than randomly chosen sets of species (i.e., the random and maxPD  
500 curves are identical) and is negative if the surrogate choice is worse than random (i.e., the  
501 maxPD curve is below the random curve). Correlates of  $S_{PD-FD}$  were evaluated using Spearman  
502 correlations.

503 Apart from focusing on average tendencies, we quantified the variability of the FD yielded by  
504 the PD—maximized selection strategy and the random selection strategy within each species  
505 pools. To do so, we compute, for each species pool and for each % of selected species

506 independently, the number of cases where  $FD_{\text{random}} > FD_{\text{maxPD}}$  across the 1000 random \*1000  
507 maxPD sets combinations (i.e.  $10^6$  comparisons). We then averaged theses number across % of  
508 selected species and report statistics across datasets (Supp. Table 1).

509 **References**

- 510 1. Pimm, S. L. *et al.* The biodiversity of species and their rates of extinction, distribution,  
511 and protection. *Science (80-. )*. **344**, (2014).
- 512 2. Hull, P. M., Darroch, S. A. F. & Erwin, D. H. Rarity in mass extinctions and the future of  
513 ecosystems. *Nature* **528**, 345–51 (2015).
- 514 3. Ceballos, G., Ehrlich, P. R. & Dirzo, R. Biological annihilation via the ongoing sixth mass  
515 extinction signaled by vertebrate population losses and declines. *Proc. Natl. Acad. Sci. U.*  
516 *S. A.* **114**, E6089–E6096 (2017).
- 517 4. Tilman, D., Wedin, D. & Knops, J. Productivity and Sustainability Influenced by  
518 Biodiversity in Grassland Ecosystems. *Nature* **379**, 718–720 (1996).
- 519 5. Srivastava, D. S. D., Cadotte, M. M. W., MacDonald, A. A. M., Marushia, R. G. &  
520 Mirotchnick, N. Phylogenetic diversity and the functioning of ecosystems. *Ecol. Lett.* **15**,  
521 637–48 (2012).
- 522 6. Cadotte, M. W., Carscadden, K. & Mirotchnick, N. Beyond species: functional diversity  
523 and the maintenance of ecological processes and services. *J. Appl. Ecol.* **48**, 1079–1087  
524 (2011).
- 525 7. Isbell, F. *et al.* Linking the influence and dependence of people on biodiversity across  
526 scales. *Nature* **546**, 65–72 (2017).
- 527 8. Pascual, U. *et al.* Valuing nature’s contributions to people: the IPBES approach. *Curr.*  
528 *Opin. Environ. Sustain.* **26–27**, 7–16 (2017).
- 529 9. Vane-Wright, R. I., Humphries, C. J. & Williams, P. H. What to protect?—Systematics and  
530 the agony of choice. *Biol. Conserv.* **55**, 235–254 (1991).
- 531 10. Bottrill, M. C. *et al.* Is conservation triage just smart decision making? *Trends in Ecology &*  
532 *Evolution* **23**, 649–654 (2008).
- 533 11. Mouillot, D. *et al.* Rare species support vulnerable functions in high-diversity ecosystems.  
534 *PLOS Biol.* **11**, (2013).
- 535 12. Mouillot, D. *et al.* Functional over-redundancy and high functional vulnerability in global  
536 fish faunas on tropical reefs. *Proc. Natl. Acad. Sci.* **111**, 13757–13762 (2014).
- 537 13. Cadotte, M. W., Davies, J. T. & Peres-Neto, P. R. Why phylogenies do not always predict

- 538 ecological differences. *Ecol. Monogr.* (2017). doi:10.1002/ecm.1267
- 539 14. Faith, D. P. Conservation evaluation and phylogenetic diversity. *Biol. Conserv.* **61**, 1–10  
540 (1992).
- 541 15. Winter, M., Devictor, V. & Schweiger, O. Phylogenetic diversity and nature conservation:  
542 where are we? *Trends Ecol. Evol.* (2013).
- 543 16. Mazel, F., Mooers, A. O. A. O., Riva, G. V. D. G. V. D. & Pennell, M. W. M. W. Conserving  
544 Phylogenetic Diversity Can Be a Poor Strategy for Conserving Functional Diversity. *Syst.*  
545 *Biol.* (2017). doi:10.1093/sysbio/syx054
- 546 17. Kelly, S., Grenyer, R. & Scotland, R. W. Phylogenetic trees do not reliably predict feature  
547 diversity. *Divers. Distrib.* **20**, 600–612 (2014).
- 548 18. Isaac, N. J. B., Turvey, S. T., Collen, B., Waterman, C. & Baillie, J. E. M. Mammals on the  
549 EDGE: conservation priorities based on threat and phylogeny. *PLoS One* **2**, e296 (2007).
- 550 19. Barak, R. S. *et al.* Taking the Long View: Integrating Recorded, Archeological,  
551 Paleoeological, and Evolutionary Data into Ecological Restoration. *Int. J. Plant Sci.* **177**,  
552 90–102 (2016).
- 553 20. Pollock, L. J., Thuiller, W. & Jetz, W. Large conservation gains possible for global  
554 biodiversity facets. *Nature* **546**, 141–144 (2017).
- 555 21. Brum, F. T. *et al.* Global priorities for conservation across multiple dimensions of  
556 mammalian diversity. *Proc. Natl. Acad. Sci. U. S. A.* 201706461 (2017).  
557 doi:10.1073/pnas.1706461114
- 558 22. Mazel *et al.* Multifaceted diversity–area relationships reveal global hotspots of  
559 mammalian species, trait and lineage diversity. *Glob. Ecol. Biogeogr.* **23**, 836–847 (2014).
- 560 23. Thuiller, W. *et al.* Conserving the functional and phylogenetic trees of life of European  
561 tetrapods. *Philos. Trans. R. Soc. Lond. B. Biol. Sci.* **370**, 20140005 (2015).
- 562 24. Mason, N. W. H. & Pavoine, S. Does trait conservatism guarantee that indicators of  
563 phylogenetic community structure will reveal niche-based assembly processes along  
564 stress gradients? *J. Veg. Sci.* **24**, 820–833 (2013).
- 565 25. Gerhold, P., Cahill, J. F., Winter, M., Bartish, I. V. & Prinzing, A. Phylogenetic patterns are  
566 not proxies of community assembly mechanisms (they are far better). *Funct. Ecol.* **29**,



- 567 600–614 (2015).
- 568 26. Devictor, V. *et al.* Spatial mismatch and congruence between taxonomic, phylogenetic  
569 and functional diversity: the need for integrative conservation strategies in a changing  
570 world. *Ecol. Lett.* **13**, 1030–1040 (2010).
- 571 27. Ferrier, S. & Watson, G. An evaluation of the effectiveness of environmental surrogates  
572 and modelling techniques in predicting the distribution of biological diversity. *Armidale  
573 NSW Environ. Aust.* (1997).
- 574 28. Rodrigues, A. S. L. & Brooks, T. M. Shortcuts for Biodiversity Conservation Planning: The  
575 Effectiveness of Surrogates. *Annu. Rev. Ecol. Evol. Syst.* **38**, 713–737 (2007).
- 576 29. Mazel, F. *et al.* The Geography of Ecological Niche Evolution in Mammals. *Curr. Biol.* **27**,  
577 1369–1374 (2017).
- 578 30. Thuiller, W. *et al.* Conserving the functional and phylogenetic trees of life of European  
579 tetrapods. *Philos. Trans. R. Soc. Lond. B. Biol. Sci.* **370**, 20140005 (2015).
- 580 31. Carvalho, S. B. *et al.* Spatial conservation prioritization of biodiversity spanning the  
581 evolutionary continuum. *Nat. Ecol. Evol.* **1**, 151 (2017).
- 582 32. Jetz, W. *et al.* Global distribution and conservation of evolutionary distinctness in birds.  
583 *Curr. Biol.* **24**, 919–30 (2014).
- 584 33. Thévenin, C., Mouchet, M., Robert, A., Kerbiriou, C. & Sarrazin, F. Reintroductions of  
585 birds and mammals involve evolutionarily distinct species at the regional scale. *Proc.  
586 Natl. Acad. Sci. U. S. A.* **115**, 3404–3409 (2018).
- 587 34. Forest, F. *et al.* Preserving the evolutionary potential of floras in biodiversity hotspots.  
588 *Nature* **445**, 757–760 (2007).
- 589 35. Brooks, T. M. *et al.* Global biodiversity conservation priorities. *Science* **313**, 58–61 (2006).
- 590 36. Srivastava, D. D. S., Cadotte, M. M. W., MacDonald, A. A. M., Marushia, R. G. &  
591 Mirotnick, N. Phylogenetic diversity and the functioning of ecosystems. *Ecol. Lett.* **15**,  
592 637–48 (2012).
- 593 37. Díaz, S. *et al.* Incorporating plant functional diversity effects in ecosystem service  
594 assessments. *Proc. Natl. Acad. Sci. U. S. A.* **104**, 20684–9 (2007).
- 595 38. Srivastava, D. S. & Vellend, M. Biodiversity-Ecosystem Function Research: Is It Relevant to

- 596 Conservation? *Annu. Rev. Ecol. Evol. Syst.* **36**, 267–294 (2005).
- 597 39. HilleRisLambers, J., Adler, P. B., Harpole, W. S., Levine, J. M. & Mayfield, M. M. Rethinking  
598 Community Assembly through the Lens of Coexistence Theory. *Annu. Rev. Ecol. Evol.*  
599 *Syst.* **43**, 227–248 (2012).
- 600 40. Faurby, S. & Svenning, J.-C. A species-level phylogeny of all extant and late Quaternary  
601 extinct mammals using a novel heuristic-hierarchical Bayesian approach. *Mol.*  
602 *Phylogenet. Evol.* **84**, 14–26 (2015).
- 603 41. Jetz, W., Thomas, G., Joy, J. & Mooers, A. Ø. The global diversity of birds in space and  
604 time. *Nature* **491**, 444–448 (2012).
- 605 42. Kattge, J. *et al.* TRY--a global database of plant traits. *Glob. Chang. Biol.* **17**, 2905–2935  
606 (2011).
- 607 43. Kate E. Jones, J. B. *et al.* PanTHERIA: a species-level database of life history, ecology, and  
608 geography of extant and recently extinct mammals. *Ecology* **90**, 2648–2648 (2009).
- 609 44. Wilman, H. *et al.* EltonTraits 1.0: Species-level foraging attributes of the world’s birds and  
610 mammals. *Ecology* **95**, 2027–2027 (2014).
- 611 45. Lavorel, S. & Garnier, E. Predicting changes in community composition and ecosystem  
612 functioning from plant traits: revisiting the Holy Grail. *Funct. Ecol.* **16**, 545–556 (2002).
- 613 46. Hurlbert, A. H. & Jetz, W. Species richness, hotspots, and the scale dependence of range  
614 maps in ecology and conservation. *Proc. Natl. Acad. Sci. U. S. A.* **104**, 13384–9 (2007).
- 615 47. Holt, B. G. *et al.* An Update of Wallace’s Zoogeographic Regions of the World. *Science*  
616 *(80- )*. **339**, 74–78 (2013).
- 617 48. Parravicini, V. *et al.* Global patterns and predictors of tropical reef fish species richness.  
618 *Ecography (Cop.)*. **36**, 1254–1262 (2013).
- 619 49. Leprieur, F. *et al.* Plate tectonics drive tropical reef biodiversity dynamics. *Nat. Commun.*  
620 **7**, 11461 (2016).
- 621 50. Ottimofiore, E. *et al.* Responses of coral reef fishes to past climate changes are related to  
622 life-history traits. *Ecol. Evol.* **7**, 1996–2005 (2017).
- 623 51. Blum, M., François, O. & Steel, M. Which Random Processes Describe the Tree of Life? A  
624 Large-Scale Study of Phylogenetic Tree Imbalance. *Syst. Biol.* **55**, 685–691 (2006).

- 625 52. Pybus, O. & Harvey, P. Testing macro–evolutionary models using incomplete molecular  
626 phylogenies. *Proc. R. Soc. London, Ser. B* **267**, 2267–2272 (2000).
- 627 53. Safi, K. *et al.* Understanding global patterns of mammalian functional and phylogenetic  
628 diversity. *Philos. Trans. R. Soc. London, Ser. B* **366**, 2536–2544 (2011).
- 629 54. Belmaker, J. & Jetz, W. Relative roles of ecological and energetic constraints,  
630 diversification rates and region history on global species richness gradients. *Ecol. Lett.* **18**,  
631 563–571 (2015).
- 632 55. Guillemot, N. *et al.* Functional Redundancy Patterns Reveal Non-Random Assembly Rules  
633 in a Species-Rich Marine Assemblage. *PLoS One* **6**, e26735 (2011).
- 634 56. Blomberg, S. P., Garland, T. J. R. & Ives, A. Testing for phylogenetic signal in comparative  
635 data : behavioral traits are more labile. *Evolution (N. Y.)* **57**, 717–745 (2003).
- 636 57. Tucker, C. M. C. M. *et al.* A guide to phylogenetic metrics for conservation, community  
637 ecology and macroecology. *Biol. Rev. Camb. Philos. Soc.* (2017). doi:10.1111/brv.12252
- 638 58. Rodrigues, A. S. L. & Gaston, K. J. Maximising phylogenetic diversity in the selection of  
639 networks of conservation areas. *Biol. Conserv.* **105**, 103–111 (2002).
- 640 59. Bordewich, M., Rodrigo, A., Semple, C. & Collins, T. Selecting Taxa to Save or Sequence:  
641 Desirable Criteria and a Greedy Solution. *Syst. Biol.* **57**, 825–834 (2008).
- 642 60. Villéger, S., Mason, N. & Mouillot, D. New multidimensional functional diversity indices  
643 for a multifaceted framework in functional ecology. *Ecology* **89**, 2290–2301 (2008).
- 644 61. Pavoine, S. & Bonsall, M. B. Measuring biodiversity to explain community assembly: a  
645 unified approach. *Biol. Rev.* **86**, 792–812 (2011).
- 646 62. Cornwell, W. K. W. K., Schwilk, D. W. W., Ackerly, D. D. D. D. & Schwilk, L. D. W. A trait-  
647 based test for habitat filtering: convex hull volume. *Ecology* **87**, 1465–1471 (2006).
- 648 63. Ricotta, C. A note on functional diversity measures. *Basic Appl. Ecol.* **6**, 479–486 (2005).
- 649 64. Villéger, S., Maire, E. & Leprieur, F. On the risks of using dendrograms to measure  
650 functional diversity and multidimensional spaces to measure phylogenetic diversity: a  
651 comment on Sobral *et al.* (2016). *Ecol. Lett.* **20**, 554–557 (2017).

652  
653
